# Supplementary material for: Ceria crystal facet impact for methane C–H activation in Pd/CeO2 catalysts
Source: Royal Society of Chemistry journal article supplement (doi:10.1039/d3cy00614j), 2023-01-01
Supplement: d3cy00614j1.pdf [file d3cy00614j1.pdf]

# **Ceria Crystal Facet Impact for Methane C–H Activation in Pd/CeO<sub>2</sub> Catalysts**

## **Supporting information**

Kewu Yang,<sup>a</sup> Ke Wang,<sup>a</sup> Xianfeng Shen,<sup>a</sup> Fanxing Zhang,<sup>a</sup> Bei Huang,<sup>a</sup> Keping Yan,<sup>a</sup> Yao  
Shi,<sup>a</sup> Yi He,<sup>\*a</sup> Pengfei Xie<sup>\*a,b,c</sup>

<sup>a</sup> College of Chemical and Biological Engineering, Zhejiang University, Hangzhou  
310027, People's Republic of China

<sup>b</sup> State Key Laboratory of Baiyunobo Rare Earth Resource Researches and  
Comprehensive Utilization, Baotou Research Institute of Rare Earths, Baotou 014030,  
China

<sup>c</sup> Shanxi-Zheda Institute of Advanced Materials and Chemical Engineering, Taiyuan,  
030032, China

\*Corresponding Author: [pfxie@zju.edu.cn](mailto:pfxie@zju.edu.cn), [yihezj@zju.edu.cn](mailto:yihezj@zju.edu.cn)

Table S1 The corresponding relationships between the characteristic peaks and the ceria crystal facets<sup>1,2</sup>

| XRD peak position | Corresponding ceria facets |
|-------------------|----------------------------|
| 28.6°             | (111)                      |
| 33.1°             | (200)                      |
| 47.5°             | (220)                      |
| 56.3°             | (311)                      |
| 59.1°             | (222)                      |
| 69.4°             | (400)                      |
| 76.7°             | (331)                      |
| 79.1°             | (420)                      |

Table S2 The corresponding relationships between the Ce 3d XPS peaks and the valence<sup>3-5</sup>

| Peak           | Binding energy (eV) | Valence state    |
|----------------|---------------------|------------------|
| V <sup>0</sup> | 880.9               | Ce <sup>3+</sup> |
| V'             | 885.2               | Ce <sup>3+</sup> |
| U <sup>0</sup> | 898.5               | Ce <sup>3+</sup> |
| U'             | 903.6               | Ce <sup>3+</sup> |
| V              | 882.6               | Ce <sup>4+</sup> |
| V''            | 888.9               | Ce <sup>4+</sup> |
| V'''           | 898.6               | Ce <sup>4+</sup> |
| U              | 901.2               | Ce <sup>4+</sup> |
| U''            | 907.5               | Ce <sup>4+</sup> |
| U'''           | 916.9               | Ce <sup>4+</sup> |

Table S3. The CH<sub>4</sub> conversion of synthesized catalysts at 215 °C for two GHSV.

| Catalyst      | Conversion-90k (%) | Conversion-200k (%) |
|---------------|--------------------|---------------------|
| CP-nanorods   | 10.83              | 4.69                |
| CP-nanocubes  | 9.14               | 3.81                |
| CP-polyhedral | 3.38               | 1.49                |

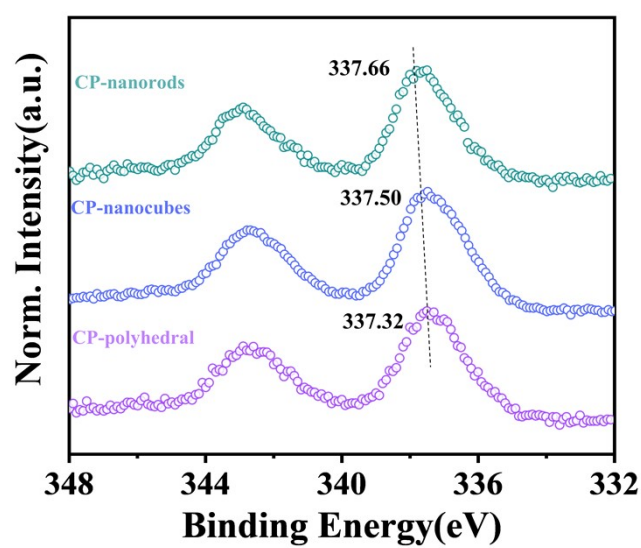

Figure S1. The XPS of Pd 3d

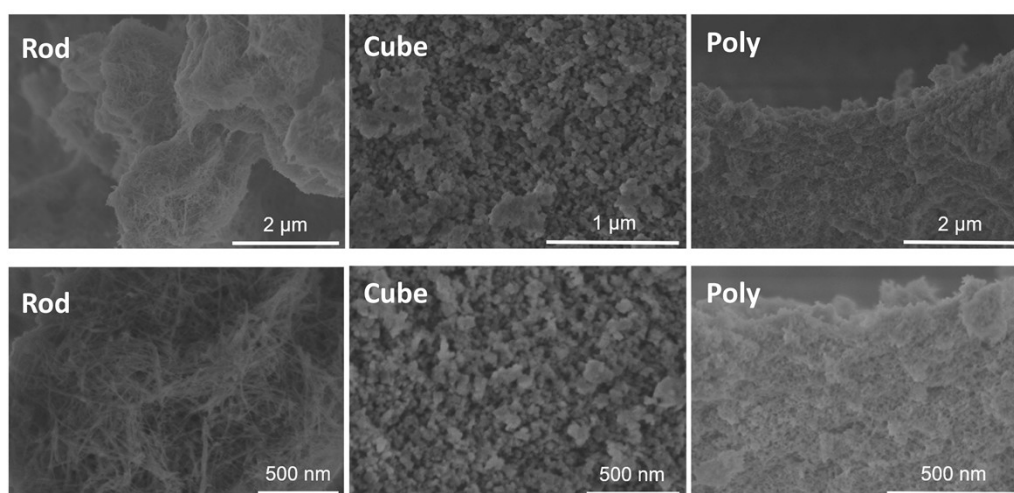

Figure S2. The SEM image of Pd/CeO<sub>2</sub> catalysts

## References

- 1 S. Chen, S. Li, R. You, Z. Guo, F. Wang, G. Li, W. Yuan, B. Zhu, Y. Gao, Z. Zhang, H. Yang and Y. Wang, *ACS Catal.*, 2021, **11**, 5666–5677.
- 2 Y. Lei, W. Li, Q. Liu, Q. Lin, X. Zheng, Q. Huang, S. Guan, X. Wang, C. Wang and F. Li, *Fuel*, 2018, **233**, 10–20.
- 3 H. Sohn, G. Celik, S. Gunduz, D. Dogu, S. Zhang, J. Shan, F. F. Tao and U. S. Ozkan, *Catal. Lett.*, 2017, **147**, 2863–2876.
- 4 X.-P. Xiang, L.-H. Zhao, B.-T. Teng, J.-J. Lang, X. Hu, T. Li, Y.-A. Fang, M.-F. Luo and J.-J. Lin, *Appl. Surf. Sci.*, 2013, **276**, 328–332.
- 5 L. Li, S. Xue, M. Wei, H. Yao, Y. Dai and Z. Fei, *Appl. Surf. Sci.*, 2022, **599**, 153909.
